# Supplementary material for: Organ fusion and defective shoot development in oni3 mutants of rice
Source: PubMed Central journal article supplement — Plant Cell Physiol. 2013 Nov 26;55(1):42–51. doi: 10.1093/pcp/pct154 (PMC3894709; doi:10.1093/pcp/pct154), 2013-11-26
Supplement: supp_pct154_pcp-2013-e-00340-File010.pdf [file supp_pct154_pcp-2013-e-00340-File010.pdf]

0N13 MALSKRMLFIFQAMVLCFSLSQGNQ--FSLRNL-----TLQKASSP-----AMRHETYDIYVGGGTAG  
0s02g0678300 MAFLVATT--LFLFG---QLLLCF50Q---VRGVNYT-----FVREAVEAP-----VMAYDYIILGGGTAG  
0s03g0118700 MAPGHRGVSYPVVLVLLVATVLSLCLSLTASPEAQKYNFR-----FARHADAP-----LVSYNYIYVGGGTAG  
0s04g0573100 MASDMOTRALIILAATSFMALACVQA---AGDESYT-----FMKDAVQSP-----QVSYDYIYVGGGTAG  
0s06g0656000 MAAPITRLHLALLLVAPTLAAQPRGFVVAPPAYAR-----YVVDAAETA-----AEAYDYIYVGGGTAG  
0s08g0401500 MGLINRGVF--FKLAFCLFRSSQGRNH---FTTLDLP-----PLLKASSFS-----RIQHEAYDYIYVGGGTAG  
0s10g0524500 MAALGRASSAP--VLAAMAVLLSLCLAALESE-EQEQENLR-----FVHAQDAP-----LVSYNYIYVGGGTAG  
HTH MALKLFLFALLCLPTSLSTASKGKKEKSKFNPRYT-----FIDKASTFSSSSSSFSNSQDQSSYDYIYVGGGTAG  
AT1G12570 MDRFWSMRLFVALSLFLHSPICSSKAP---NYS-----FMRDATGSP-----TTSYDYIYVGGGTAG  
AT1G14185 MSHFVFLIISMLINQSQAMPYMTDPKEVS-----GKSFYDIYVGGGTAG  
AT1G14190 MPMYTTDAKEVS-----GKSFYDIYVGGGTAG  
AT1G73050 MTKRIDSLLYTLVLLGVVHRSNARPRVNRPPGFMV-----FISNATDFA-----SEYDYIYVGGGTAG  
AT1G356060 MNHFIRFFQFIIIVAVFIFHDSYCSDEAG---NYS-----FMKDATLAP-----KLSHFYDIYVGGGTAG  
AT5G51930 MTIISCIITHIFRNILFALLIFGYSYCKDKGTLLSYKYNLIIYISIFFFLVKLETTFMKDATLAP-----KIASFDYIYVGGGTAG  
AT5G51950 MGLQLLWFRKIFITTYFHASCPDKAG---YYS-----FMKDATLAP-----MFAFDYIYVGGGTAG

0N13 CPLAATLSLK--YKVLLEGGSPYGNRNYSYMFHIGLSNMAP---DSASQAFISTDGVINARARLVGGGTINAGFYSRASSNFIQEVG-----  
0s02g0678300 CPLAATLSER--YRVLLEGGSPYDARVNLMAHFDVADLADTSG---ASPAQRFVSEDGVINARARLVGGGTINAGFYSTRAGPYVRALG-----  
0s03g0118700 CPLAATLSER--SRVLLLEGGSPYGNRNYSSEYHFADALADTSP---RSPAQRFVSEDGVINARARLVGGGTINAGFYSTRASSGYVRAAG-----  
0s04g0573100 CPLAATLSQR--FRVLLLEGGSPYDIDERIGNMTRFADTLSDTSP---SSPAQRFVSEDGVINARARLVGGGTINAGFYSTRASDEYVRGLG-----  
0s06g0656000 CPLAATLAGPGGRVLLVERGGAPAEFPPLATAGFVRTLAMADPAPESDAPQTFASEDGVINARARLVGGGTINAGFYSTRADPWFRSAGEEAMN-----  
0s08g0401500 CPLAATLSQK--YKVLLEGGSPYGNRNISLHNFHICLADDSPT---NSPQGFISTDGVINARARLVGGGTINAGFYSTRADPFSVQDAG-----  
0s10g0524500 CPLAATLSER--SRVLLLEGGSPYAN--MSSEHFDALADTSP---ASPAQRFVSEDGVINARARLVGGGTINAGFYSTRASNEVYRASG-----  
HTH CPLAATLSQN--FVSVLLEGGSPYNTANVNSFLRNHIFGLADISA---SSASQAFVSTDGVINARARLVGGGTINAGFYSTRADAAFYVRKAG-----  
AT1G12570 CPLAATLSQK--ASVLLLEGGSPYNNPNIITRSLAFAALSDLSE---SSPQRFVSEDGVINARARLVGGGTINAGFYSTRAGTKYVRNMG-----  
AT1G14185 CSLAATLSEK--YSVLLEGGSPFDPLVEEKYFYGYSLINTDEY---SSVAQSFVSDGVINARARLVGGGTINAGFYSTRASDFVKKAG-----  
AT1G14190 CSLAATLSEK--YSVLLEGGSPFDPLVEEKYFYGYSLINTDEY---SSVAQSFVSDGVINARARLVGGGTINAGFYSTRASDFVKKAG-----  
AT1G73050 CPLAATLSQS--FRVLLLEGGSPYNRNPMWHDGFLTLTDVN---NFDSPAQFISEEGVGNARARLVGGGTINAGFYSTRADQFFENSG---LV-----  
AT1G356060 CALAATLSQN--ATVLLLEGGSPYDPAATDIGNFANTLLNITP---NSWSQLFISEDGVINARARLVGGGTINAGFYSTRADQFFENSG---LV-----  
AT5G51930 CALAATLSQN--ASVLLLEGGSPYENPATDIGNFANTLLNITP---NSWSQLFISEDGVINARARLVGGGTINAGFYSTRADQFFENSG---LV-----  
AT5G51950 CALAATLSQN--ASVLLLEGGSPYDPAATDIGNFANTLLNITP---NSWSQLFISEDGVINARARLVGGGTINAGFYSTRADQFFENSG---LV-----

0N13 WDEDLVNEFPWVEDKIVQWPKIAPWQALRDGLLQAGVSPFNQYTYHVSSTKVGKTFDFTYRHTAADLAAAGDPNNRLVLLHASVNRIVFNS----  
0s02g0678300 WDPKEVVSAYQWEDVFAQPELGPWQALRRGLLEIGVDPNGFYTHDILGTVKVGISFDAQRRHTAADLRYSRPQDIDVFRAGVYVRS----  
0s03g0118700 WDPRLVNASYRWVERLFRPDPWRQCALREGLLQAGVTPDNGYTLHVQGTGIGGTFIDRAGRHTAADLRRARHPRRLTVFLRAT-----  
0s04g0573100 WDLAATTAAYRWEDVFAQPELGPWQALRRGLLEAGIAPQNGFTDHLGTVKVGISFDAEGRHTAADLRYSRPQDIDVFRAGVYVRS----  
0s06g0656000 WDKMLVNSYWEVERLAFQPVVRQNAQVRAAGLEAVNTPMNGFTMDHVSSTKVGKTFDFTYRHTAADLAAAGDPNNRLVLLHASVNRIVFNS----  
0s08g0401500 WDAELVNSYWEVERLAFQPVVRQNAQVRAAGLEAVNTPMNGFTMDHVSSTKVGKTFDFTYRHTAADLAAAGDPNNRLVLLHASVNRIVFNS----  
0s10g0524500 WDLVNSYWEVERLAFQPVVRQNAQVRAAGLEAVNTPMNGFTMDHVSSTKVGKTFDFTYRHTAADLAAAGDPNNRLVLLHASVNRIVFNS----  
HTH WDKMLVNSYWEVERLAFQPVVRQNAQVRAAGLEAVNTPMNGFTMDHVSSTKVGKTFDFTYRHTAADLAAAGDPNNRLVLLHASVNRIVFNS----  
AT1G73050 WDLVNSYWEVERLAFQPVVRQNAQVRAAGLEAVNTPMNGFTMDHVSSTKVGKTFDFTYRHTAADLAAAGDPNNRLVLLHASVNRIVFNS----  
AT1G356060 WDLVNSYWEVERLAFQPVVRQNAQVRAAGLEAVNTPMNGFTMDHVSSTKVGKTFDFTYRHTAADLAAAGDPNNRLVLLHASVNRIVFNS----  
AT5G51930 WDLVNSYWEVERLAFQPVVRQNAQVRAAGLEAVNTPMNGFTMDHVSSTKVGKTFDFTYRHTAADLAAAGDPNNRLVLLHASVNRIVFNS----  
AT5G51950 WDLVNSYWEVERLAFQPVVRQNAQVRAAGLEAVNTPMNGFTMDHVSSTKVGKTFDFTYRHTAADLAAAGDPNNRLVLLHASVNRIVFNS----  
AT1G12570 WDLVNSYWEVERLAFQPVVRQNAQVRAAGLEAVNTPMNGFTMDHVSSTKVGKTFDFTYRHTAADLAAAGDPNNRLVLLHASVNRIVFNS----  
AT1G14185 WDLVNSYWEVERLAFQPVVRQNAQVRAAGLEAVNTPMNGFTMDHVSSTKVGKTFDFTYRHTAADLAAAGDPNNRLVLLHASVNRIVFNS----  
AT1G14190 WDLVNSYWEVERLAFQPVVRQNAQVRAAGLEAVNTPMNGFTMDHVSSTKVGKTFDFTYRHTAADLAAAGDPNNRLVLLHASVNRIVFNS----

0N13 ---QRQLKPRATGVQFDENGELHQAFVLSNCD---SEIIVSAGAIQSPQLLLSGIGPKNDLRSHKIP--VVLHNKYGVGMADPNNSYMFIFPTKSP-P  
0s02g0678300 ---RKGTPKPARVGLYHDARGGSHMAYLNHGAR---NEIILSAGALGSPQLLMLSGVGPADHLEEFGIS--LVLDHPVGGQVSDNPNMAYIYVPSPP-V  
0s03g0118700 ---GTATPVYGVVFTPDAGVRHMYLHGGAK---SEVIVTATGLGSPQLLMLSGVGPADHLEEFGIS--LVLDHPVGGQVSDNPNMAYIYVPSPP-V  
0s04g0573100 ---RAGRPRVAHGVVHDSGQMRHALNNGRG---NEIILSAGALGSPQLLMLSGVGPADHLEEFGIS--LVLDHPVGGQVSDNPNMAYIYVPSPP-V  
0s06g0656000 ARRGRSPQPAVAASGVYVQDRLLQHQHALLRPPGGE---VILSAGALGSPQLLMLSGVGPADHLEEFGIS--LVLDHPVGGQVSDNPNMAYIYVPSPP-V  
0s08g0401500 ---EQEHRKPTIGVEFKDENGQQAHLFTRNRD---SEIIVSAGAIQSPQLLLSGIGPKNDLRSHKIP--VVLHNKYGVGMADPNNSYMFIFPTKSP-P  
0s10g0524500 ---QDGVPPYVAVGVVSDPLGQVHVRYLDRDGDK---NEVIVSAGALGSPQLLMLSGVGPADHLEEFGIS--LVLDHPVGGQVSDNPNMAYIYVPSPP-V  
HTH ---SG---TRPRVTGIFKDEKGNQHQALLSNRKG---SEVIVSAGAIQSPQLLMLSGVGPADHLEEFGIS--LVLDHPVGGQVSDNPNMAYIYVPSPP-V  
AT1G73050 IGSN-----VSAIGVYVQDRLLQHQHALLRPPGGE---VILSAGALGSPQLLMLSGVGPADHLEEFGIS--LVLDHPVGGQVSDNPNMAYIYVPSPP-V  
AT1G356060 ---K---GRPKAYGVIFLDANGVYKAEATQDSTVSEVILSAGAIQSPQLLMLSGVGPADHLEEFGIS--LVLDHPVGGQVSDNPNMAYIYVPSPP-V  
AT5G51930 ---K---GRPKAYGVIFLDANGVYKAEATQDSTVSEVILSAGAIQSPQLLMLSGVGPADHLEEFGIS--LVLDHPVGGQVSDNPNMAYIYVPSPP-V  
AT5G51950 ---K---GRPKAYGVIFLDANGVYKAEATQDSTVSEVILSAGAIQSPQLLMLSGVGPADHLEEFGIS--LVLDHPVGGQVSDNPNMAYIYVPSPP-V  
AT1G12570 ---R---GTTKPIANGVYVDRRTGQAHRYLKEGAL---SEIILSAGALGSPQLLMLSGVGPADHLEEFGIS--LVLDHPVGGQVSDNPNMAYIYVPSPP-V  
AT1G14185 ---R---GTTKPIANGVYVDRRTGQAHRYLKEGAL---SEIILSAGALGSPQLLMLSGVGPADHLEEFGIS--LVLDHPVGGQVSDNPNMAYIYVPSPP-V  
AT1G14190 ---R---GTTKPIANGVYVDRRTGQAHRYLKEGAL---SEIILSAGALGSPQLLMLSGVGPADHLEEFGIS--LVLDHPVGGQVSDNPNMAYIYVPSPP-V

0N13 RQSLIETVITEAG---VFIEASSGFGQSPESIHCHHIMSAEIQLST-----IPPKERSLEKQKYANTKLNLPKEIFHGGLILEKIDPLSTGHL  
0s02g0678300 ELSLQVQVITRF---SYIEGASGSDNRSRTSGAAAQ--VRSFQMFSPQTQGLATVPKQRTPEALARAEEAMVQVPAALRGGGLEKLVGPQSTGRL  
0s03g0118700 ELSLQVQVITRF---SYIEGASGSDNRSRTSGAAAQ--VRSFQMFSPQTQGLATVPKQRTPEALARAEEAMVQVPAALRGGGLEKLVGPQSTGRL  
0s04g0573100 EVSLQVQVITEG---SYIEGASGANVRRSFGSGDRPHRNFQMFSPQTQGLATVPKQRTPEALARAEEAMVQVPAALRGGGLEKLVGPQSTGRL  
0s06g0656000 DHSLLQVQVITRF---SYIEGASGANVRRSFGSGDRPHRNFQMFSPQTQGLATVPKQRTPEALARAEEAMVQVPAALRGGGLEKLVGPQSTGRL  
0s08g0401500 KQSLQVQVITRF---AFIEASSGFGQSPESIHCHHIMSAEIQLST-----IPPKERSLEKQKYANTKLNLPKEIFHGGLILEKIDPLSTGHL  
0s10g0524500 ELSLQVQVITRF---SYIEGASGSDNRSRTSGAAAQ--VRSFQMFSPQTQGLATVPKQRTPEALARAEEAMVQVPAALRGGGLEKLVGPQSTGRL  
HTH EQSLQVQVITEG---TYEAAGGENFGGGGSSGSSSTRDYAMFS-----PRATLLESNMTKLSSAQPPQGGLEKLVGPQSTGRL  
AT1G73050 ENSLQVQVITEG---AFLEAASN-----VIFPASPLHSVFIAPASPLVYVPTIMEKILGPSVIGLL  
AT1G356060 EVSLQVQVITRF---SYIEGASGSDNRSRTSGAAAQ--VRSFQMFSPQTQGLATVPKQRTPEALARAEEAMVQVPAALRGGGLEKLVGPQSTGRL  
AT5G51930 ELSLQVQVITEG---SYIEGASGSDNRSRTSGAAAQ--VRSFQMFSPQTQGLATVPKQRTPEALARAEEAMVQVPAALRGGGLEKLVGPQSTGRL  
AT5G51950 EVSLQVQVITEG---TYEAAGGENFGGGGSSGSSSTRDYAMFS-----PRATLLESNMTKLSSAQPPQGGLEKLVGPQSTGRL  
AT1G12570 EVSLQVQVITEG---TYEAAGGENFGGGGSSGSSSTRDYAMFS-----PRATLLESNMTKLSSAQPPQGGLEKLVGPQSTGRL  
AT1G14185 TVDPPQVAITEG---KFLLQSLVPTNITTTTRTASIAKIAFPPKSKGRLEP-----KFILLESLVPTDITTTTASIAKIAFPPKSKGRLEP  
AT1G14190 TLEPPQVAIAIEG-----KFILLESLVPTDITTTTASIAKIAFPPKSKGRLEP-----KFILLESLVPTDITTTTASIAKIAFPPKSKGRLEP

0N13 ALIDTDVKKNPVAVTFNYFSPHQDLTRCVYGIKIERLKTNRSELSANTDG--HSMERVLNNSVQANVN--LIPKHTNDESL---EQFCRDVTWIIWY  
0s02g0678300 ALRNLDPDNPVTFNYFSPHQDLTRCVYGIKIERLKTNRSELSANTDG--HSMERVLNNSVQANVN--LIPKHTNDESL---EQFCRDVTWIIWY  
0s03g0118700 ALRSADPDNPVAVTFNYFSPHQDLTRCVYGIKIERLKTNRSELSANTDG--HSMERVLNNSVQANVN--LIPKHTNDESL---EQFCRDVTWIIWY  
0s04g0573100 ELRNRNPDDNPVAVTFNYFSPHQDLTRCVYGIKIERLKTNRSELSANTDG--HSMERVLNNSVQANVN--LIPKHTNDESL---EQFCRDVTWIIWY  
0s06g0656000 WLTSNPLESPSVRFNLSRREDLARCVTGMRRVAKVLESTMDVFRSAMG-----SLSDSRRREFRIVGAALPVDNRDNTDGLDQCFQVATVLIWY  
0s08g0401500 VLVDTDINSNPVTFNYFSPHQDLTRCVYGIKIERLKTNRSELSANTDG--HSMERVLNNSVQANVN--LIPKHTNDESL---EQFCRDVTWIIWY  
0s10g0524500 ELRNTDPRANPSVTFNYFSPHQDLTRCVYGIKIERLKTNRSELSANTDG--HSMERVLNNSVQANVN--LIPKHTNDESL---EQFCRDVTWIIWY  
HTH SLVNTVNDNPVAVTFNYFSPHQDLTRCVYGIKIERLKTNRSELSANTDG--HSMERVLNNSVQANVN--LIPKHTNDESL---EQFCRDVTWIIWY  
AT1G73050 RLASTDVRINPVRNRYFSDPQLERCVNGTRKIGELRSRAMQDF-----MIREWFNRRFRVAGPLVDQ--SNDLVWADCFRTVSTIWIWY  
AT1G356060 ELRNTDPRANPSVTFNYFSPHQDLTRCVYGIKIERLKTNRSELSANTDG--HSMERVLNNSVQANVN--LIPKHTNDESL---EQFCRDVTWIIWY  
AT5G51930 KLRLNTPRDNPSVTFNYFSPHQDLTRCVYGIKIERLKTNRSELSANTDG--HSMERVLNNSVQANVN--LIPKHTNDESL---EQFCRDVTWIIWY  
AT5G51950 ELRNTDPRANPSVTFNYFSPHQDLTRCVYGIKIERLKTNRSELSANTDG--HSMERVLNNSVQANVN--LIPKHTNDESL---EQFCRDVTWIIWY  
AT1G12570 ELRNTDPRANPSVTFNYFSPHQDLTRCVYGIKIERLKTNRSELSANTDG--HSMERVLNNSVQANVN--LIPKHTNDESL---EQFCRDVTWIIWY  
AT1G14185 KLNTNTPRDNPSVTFNYFSPHQDLTRCVYGIKIERLKTNRSELSANTDG--HSMERVLNNSVQANVN--LIPKHTNDESL---EQFCRDVTWIIWY  
AT1G14190 KLNTNTPRDNPSVTFNYFSPHQDLTRCVYGIKIERLKTNRSELSANTDG--HSMERVLNNSVQANVN--LIPKHTNDESL---EQFCRDVTWIIWY

0N13 HGGCHVGVVDDQHRVLLGVSQVRRVDSGTFRSPTGNPQATVMMVMGRYGVWILRGLRGAAGV  
0s02g0678300 HGGCQVGRVVDQHRVLLGVSQVRRVDSGTFRSPTGNPQATVMMVMGRYGVWILRGLRGAAGV  
0s03g0118700 HGGCHVGVVDDQHRVLLGVSQVRRVDSGTFRSPTGNPQATVMMVMGRYGVWILRGLRGAAGV  
0s04g0573100 HGGCQVGRVVDQHRVLLGVSQVRRVDSGTFRSPTGNPQATVMMVMGRYGVWILRGLRGAAGV  
0s06g0656000 HGGCHVGVVDDQHRVLLGVSQVRRVDSGTFRSPTGNPQATVMMVMGRYGVWILRGLRGAAGV  
0s08g0401500 HGGCQVGRVVDQHRVLLGVSQVRRVDSGTFRSPTGNPQATVMMVMGRYGVWILRGLRGAAGV  
0s10g0524500 HGGCHVGVVDDQHRVLLGVSQVRRVDSGTFRSPTGNPQATVMMVMGRYGVWILRGLRGAAGV  
HTH HGGCQVGRVVDQHRVLLGVSQVRRVDSGTFRSPTGNPQATVMMVMGRYGVWILRGLRGAAGV  
AT1G73050 HGGCHVGVVDDQHRVLLGVSQVRRVDSGTFRSPTGNPQATVMMVMGRYGVWILRGLRGAAGV  
AT1G356060 HGGCQVGRVVDQHRVLLGVSQVRRVDSGTFRSPTGNPQATVMMVMGRYGVWILRGLRGAAGV  
AT5G51930 HGGCQVGRVVDQHRVLLGVSQVRRVDSGTFRSPTGNPQATVMMVMGRYGVWILRGLRGAAGV  
AT5G51950 HGGCQVGRVVDQHRVLLGVSQVRRVDSGTFRSPTGNPQATVMMVMGRYGVWILRGLRGAAGV  
AT1G12570 HGGCQVGRVVDQHRVLLGVSQVRRVDSGTFRSPTGNPQATVMMVMGRYGVWILRGLRGAAGV  
AT1G14185 HGGCQVGRVVDQHRVLLGVSQVRRVDSGTFRSPTGNPQATVMMVMGRYGVWILRGLRGAAGV  
AT1G14190 HGGCQVGRVVDQHRVLLGVSQVRRVDSGTFRSPTGNPQATVMMVMGRYGVWILRGLRGAAGV
