# Supplementary material for: Organ fusion and defective shoot development in oni3 mutants of rice
Source: PubMed Central journal article supplement — Plant Cell Physiol. 2013 Nov 26;55(1):42–51. doi: 10.1093/pcp/pct154 (PMC3894709; doi:10.1093/pcp/pct154), 2013-11-26
Supplement: supp_pct154_pcp-2013-e-00340-File011.pdf [file supp_pct154_pcp-2013-e-00340-File011.pdf]

Supplemental Table 1. Primers used in this study

| Gene                   | Locus ID     | Primer   | Sequence                                          | Purpose            |
|------------------------|--------------|----------|---------------------------------------------------|--------------------|
| <i>ONI3</i>            | Os09g0363900 | oni3-1   | CTTGCTACGGTTGGTTGGTT                              | PCR and sequencing |
|                        |              | oni3-2   | GGAGGAATGCCTGAGAAACA                              | PCR and sequencing |
|                        |              | oni3-3   | GGAACACTTTGTTTTCTCAGGC                            | PCR and sequencing |
|                        |              | oni3-4   | TGAACTCTCTTGGCTGGTCA                              | PCR and sequencing |
|                        |              | oni3-5   | TCCCGTAGTCTTCAAGAAGGAA                            | PCR and sequencing |
|                        |              | oni3-6   | GTAGGAGCTTTGGCCACACA                              | PCR and sequencing |
|                        |              | oni3-7   | ACTTGCAGCTGGAGACCCTA                              | PCR and sequencing |
|                        |              | oni3-8   | AAGCAGCAGCTTTTTCTGA                               | PCR and sequencing |
|                        |              | oni3-9   | TTGTTCCCTACTTGGCCTTG                              | PCR and sequencing |
|                        |              | oni3-10  | GGGGTGTCTCTACTTGCTGC                              | PCR and sequencing |
|                        |              | ONI3-F1  | GGGGACAAGTTTGTACAAAAAAGCAGGCTCTTTCTGGTTCTTCACAGGT | genome cloning     |
|                        |              | ONI3-F5  | GATACACCATTCTGCTGCA                               | genotyping         |
|                        |              | ONI3-R1  | GGGGACCACTTTGTACAAGAAAGCTGGGTGTCCTACAATCACTCACGCC | genome cloning     |
|                        |              | ONI3-R2  | CTGGTGGAGTCCTCCATTCT                              | genotyping         |
| <i>OsIAA7</i>          | Os02g0228900 | IAA7-F1  | GATGGTGTCCCTATTGGTAG                              | qRT-PCR            |
|                        |              | IAA7-R1  | CAACACTCAGCAGCTGTTCT                              | qRT-PCR            |
| <i>OsIAA14</i>         | Os03g0797800 | IAA14-F1 | CACTTCGCCGTCGCCTATGA                              | qRT-PCR            |
|                        |              | IAA14-R1 | CCGATCCAAGTGAATCCTGA                              | qRT-PCR            |
| <i>OsPIN3a</i>         | Os01g0643300 | PIN3a-F1 | TCCATGCCAGCAATCGTCGA                              | qRT-PCR            |
|                        |              | PIN3a-R1 | GTCCAAGAAGGATGTAGTAC                              | qRT-PCR            |
| <i>OsPIN5a</i>         | Os01g0919800 | PIN5a-F1 | TCCGCGTCGCCATCATAACAG                             | qRT-PCR            |
|                        |              | PIN5a-R1 | CATAGAACTCGATACTCCCA                              | qRT-PCR            |
| <i>ROC1</i>            | Os08g0187500 | ROC1-F1  | TAGTAGCACCGGCTTCAACC                              | RT-PCR             |
|                        |              | ROC1-R1  | CAGACAACACATCACAACAG                              | RT-PCR             |
| <i>RAc1</i><br>(actin) | Os03g0718100 | RAc-1    | AACTGGGATGATATGGAGAA                              | qRT-PCR            |
|                        |              | RAc-2    | CCTCCAATCCAGACACTGTA                              | qRT-PCR            |
